# Supplementary material for: Serum KL-6 and eGFR Predict Everolimus-Induced Lung Injury in Heart Transplant Recipients: A Retrospective Observational Study
Source: Research Square preprint supplement (doi:10.21203/rs.3.rs-8815683/v1), 2026-02-13
Supplement: Supplementary file 1 [file 0d39a55134103d080d702ea0.docx]

Supplementary Table. Changes in serum KL-6 levels in relation to EVR dose modification

| Action | KL-6 decrease | KL-6 no change | KL-6 increase | not assesseda |
| --- | --- | --- | --- | --- |
| Stop or Reduction | 6 | 1 | 0 | 0 |
| Stay | 1 | 5 | 2 | 1 |

Summary of individual patient data regarding changes in serum KL-6 levels following continuation, reduction, or discontinuation of EVR therapy. In patients who underwent EVR dose reduction or discontinuation (n = 7), serum KL-6 levels decreased in the majority of cases. In contrast, among patients who continued EVR at the same dose (n = 8), KL-6 levels remained stable or increased in most cases.

KL-6: Krebs von den Lungen-6

a: not assessed due to insufficient KL-6 measurement
